# Supplementary material for: A study protocol for a non-randomised comparison trial evaluating the feasibility and effectiveness of a mobile cognitive–behavioural programme with integrated coaching for anxious adults in primary care
Source: PubMed Central journal article supplement — BMJ Open. 2018 Jan 13;8(1):e019108. doi: 10.1136/bmjopen-2017-019108 (PMC5781102; doi:10.1136/bmjopen-2017-019108), 2018-01-13
Supplement: bmjopen-2017-019108.draft_revisions.pdf [file bmjopen-2017-019108.draft_revisions.pdf]

# BMJ Open

BMJ Open is committed to open peer review. As part of this commitment we make the peer review history of every article we publish publicly available.

When an article is published we post the peer reviewers' comments and the authors' responses online. We also post the versions of the paper that were used during peer review. These are the versions that the peer review comments apply to.

The versions of the paper that follow are the versions that were submitted during the peer review process. They are not the versions of record or the final published versions. They should not be cited or distributed as the published version of this manuscript.

BMJ Open is an open access journal and the full, final, typeset and author-corrected version of record of the manuscript is available on our site with no access controls, subscription charges or pay-per-view fees (<http://bmjopen.bmj.com>).

If you have any questions on BMJ Open's open peer review process please email [editorial.bmjopen@bmj.com](mailto:editorial.bmjopen@bmj.com)

# BMJ Open

## Assessing feasibility and effectiveness of a mobile cognitive behavioral program with integrated coaching for anxious adults in primary care: protocol for a mixed method parallel group study.

|                                 |                                                                                                                                                                                                                                                                                                                                                                                                                                                                                                                                                                  |
|---------------------------------|------------------------------------------------------------------------------------------------------------------------------------------------------------------------------------------------------------------------------------------------------------------------------------------------------------------------------------------------------------------------------------------------------------------------------------------------------------------------------------------------------------------------------------------------------------------|
| Journal:                        | <i>BMJ Open</i>                                                                                                                                                                                                                                                                                                                                                                                                                                                                                                                                                  |
| Manuscript ID                   | bmjopen-2017-019108                                                                                                                                                                                                                                                                                                                                                                                                                                                                                                                                              |
| Article Type:                   | Protocol                                                                                                                                                                                                                                                                                                                                                                                                                                                                                                                                                         |
| Date Submitted by the Author:   | 11-Aug-2017                                                                                                                                                                                                                                                                                                                                                                                                                                                                                                                                                      |
| Complete List of Authors:       | Szigethy, Eva; University of Pittsburgh, Department of Psychiatry and Medicine<br>Solano, Francis; University of Pittsburgh, Department of Internal Medicine<br>Wallace, Meredith; University of Pittsburgh<br>Perry, Dina; University of Pittsburgh Medical Center Health System, Health Services Division<br>Morrell, Lauren ; Thrive Network, Inc.<br>Scott, Kathryn; University of Pittsburgh Medical Center Enterprises<br>Jones Bell, Megan; Stanford University, Department of Psychiatry and Behavioral Sciences<br>Oser, Megan; Thrive Network, Inc., ; |
| <b>Primary Subject Heading</b>: | Mental health                                                                                                                                                                                                                                                                                                                                                                                                                                                                                                                                                    |
| Secondary Subject Heading:      | Evidence based practice, General practice / Family practice, Patient-centred medicine                                                                                                                                                                                                                                                                                                                                                                                                                                                                            |
| Keywords:                       | PRIMARY CARE, anxiety, quality of life, cognitive behavioral, mHealth, digital health                                                                                                                                                                                                                                                                                                                                                                                                                                                                            |
|                                 |                                                                                                                                                                                                                                                                                                                                                                                                                                                                                                                                                                  |

SCHOLARONE™  
Manuscripts

**Assessing feasibility and effectiveness of a mobile cognitive behavioral program with integrated coaching for anxious adults in primary care: protocol for a mixed method parallel group study.**

Eva Szigethy, MD, PhD, Francis Solano, MD, Meredith Wallace, PhD, Dina L. Perry, MBA, Lauren Morrell, BA, Kathryn Scott, MA, Megan Jones Bell, PsyD; Megan Oser, PhD

Eva Szigethy, Professor of Psychiatry, Medicine, & Pediatrics, Department of Psychiatry and Medicine, University of Pittsburgh, 3708 Fifth Avenue, 4<sup>th</sup> Floor, Pittsburgh, PA 15213; Francis Solano, Professor, Department of Internal Medicine, University Center, Suite 100A, 120 Lytton Ave, University of Pittsburgh, Pittsburgh, PA; 15213; Meredith Wallace, Assistant Professor, Department of Psychiatry and Medicine, 3811 O'Hara St., University of Pittsburgh, Pittsburgh, PA, 15213; Dina L. Perry, MBA, Executive Administrator II, UPMC Health Services Division, UPMC Community Medicine Inc., Renaissance Family Practice UPMC, 3600 Forbes Avenue, Forbes Tower, 9035, Pittsburgh, PA 15213; Lauren Morrell, Director of Partnerships, Lantern, 2 Shaw Alley, San Francisco, CA; Kathryn Scott, Director of Product Management, Consumer Health UPMC Enterprises, Bakery Square, Suite 200 6425 Penn Avenue, Pittsburgh, PA 15206; Megan Jones Bell, Consulting Associate Professor, Department of Psychiatry and Behavioral Sciences, 401 Quarry Road, Stanford University, Stanford, CA; Megan Oser, Director of Research, Lantern, 2 Shaw Alley, San Francisco, CA.

Correspondence to: Megan Oser, PhD; [moser@golantern.com](mailto:moser@golantern.com)

1 **Copyright:** The Corresponding Author has the right to grant on behalf of all authors and does grant on behalf of all  
2 authors, an exclusive licence on a worldwide basis to the BMJ Publishing Group Ltd to permit this article (if  
3 accepted) to be published in BMJ editions and any other BMJ PGL products and sublicences such use and exploit all  
4 subsidiary rights, as set out in our licence.  
5

6 **Competing Interest Statement:** All authors have completed the Unified Competing Interest form (available  
7 on request from the corresponding author) and declare: no outside support from any organisation for the  
8 submitted work; Dr. Szigethy reports grants from NIH, personal fees from Abbvie Consultant, personal fees  
9 from Sherman Prize, personal fees from APPI. Dr. Jones Bell, Dr. Oser, and Lauren Morrell report being a  
10 shareholder in Thrive Network Inc (DBA, Lantern). Kathryn Perry, MA is employed by UPMC Enterprises and  
11 UPMC Enterprises is an investor in Thrive Network, Inc. Dr. Solano, Dr. Wallace, and Dina Perry have nothing  
12 to disclose. No other relationships or activities that could appear to have influenced the submitted work.  
13  
14

15  
16 **Transparency Declaration:** Dr. Szigethy, the lead author (the manuscript's guarantor) affirms that the manuscript  
17 is an honest, accurate, and transparent account of the study being reported; that no important aspects of the study  
18 have been omitted; and that any discrepancies from the study as planned (and, if relevant, registered) have been  
19 explained.  
20  
21  
22  
23  
24  
25  
26  
27  
28  
29  
30  
31  
32  
33  
34  
35  
36  
37  
38  
39  
40  
41  
42  
43  
44  
45  
46  
47  
48  
49  
50  
51  
52  
53  
54  
55  
56  
57  
58  
59  
60

**ABSTRACT**

**Introduction:** Generalized anxiety disorder (GAD) and subclinical GAD are highly prevalent in primary care. Unmanaged anxiety worsens quality of life in patients seen in primary care practices and leads to increased medical utilization and costs. Programs that teach patients cognitive behavioral therapy (CBT) techniques have been shown to improve anxiety and to prevent the evolution of anxiety symptoms to disorders but access and engagement have hampered integration of CBT into medical settings.

**Methods and Analysis:** This pragmatic study takes place in University of Pittsburgh Medical Center primary care practices to evaluate a coach supported mobile cognitive behavioral program (Lantern) on anxiety symptoms and quality of life. Clinics were non-randomly assigned to either enhanced treatment as usual or Lantern. All clinics provide electronic screening for anxiety and, within clinics assigned to provide Lantern, patients meeting a threshold level are provided Lantern. The first study phase is aimed at establishing feasibility, acceptability, and effectiveness. The second phase focuses on long-term impact on psychosocial outcomes, healthcare utilization, and clinic/provider adoption/sustainable implementation using a propensity score matched parallel group study design with mixed qualitative and quantitative analyses. Primary outcomes are changes in anxiety symptoms (GAD7) and quality of life (SF-12) between baseline and 6 -month follow-ups, comparing control and intervention. Secondary outcomes include provider and patient satisfaction, patient engagement, durability of changes in anxiety symptoms and quality of life over 12 months and the impact of Lantern on healthcare utilization over 12 months. Patients from the control sites will be matched to the patients who utilize the mobile app. Trial Registration: <https://clinicaltrials.gov/ct2/show/NCT03035019>.

**Ethics and Dissemination:** Ethics and human subject research approval were obtained. A data safety monitoring board is overseeing trial data and ethics. Results will be communicated to the participating primary care practices, published, and presented at clinical and scientific conferences/meetings.

Word Count: 298

## Strengths and Limitations of the Study (bullet points)

### Strengths

- First study evaluating a coach-guided cognitive behavioral program delivered via mobile app in primary care
- Pragmatic two arm parallel comparison effectiveness study design to allow for the evaluation of a digital behavioral intervention in primary care settings with minimal research infrastructure in place
- Screening and digital intervention being tested are integrated into electronic health record
- Detailed characterization of a large primary care population to understand who engages and uses mobile app-based CBT
- Propensity score matching of patients from comparison primary care sites without access to the digital CBT intervention.

### Limitations

- Lack of randomization of the sample.
- With the absence of research-related facilitators of study recruitment (e.g., subject payments, research assistant facilitated recruitment), there may be high rates of missing data and completer rates may be smaller than in typical efficacy trials.
- Few clinics were used as the site of patient recruitment potentially limiting generalizability of the findings.

## INTRODUCTION

Behavioral health conditions are among the most prevalent health problems in the U.S. population with a lifetime prevalence of 5.8% and twice as common in females.<sup>1</sup> Depression and anxiety disorders are the most common psychiatric disorders in the general population and major drivers of healthcare costs.<sup>2,3</sup> In fact, it is in the primary care setting that most mental health disorders are addressed and treated.<sup>4,5</sup> In the subset of patients with chronic medical conditions, behavioral health issues are even more common and costly.<sup>6-8</sup> These rates are likely even higher since less acute patients may not seek care outright, seeing themselves only as “stressed,” leaving them undercounted.<sup>9,10</sup>

Over the past several years, there have been two broad shifts in behavioral health: integrating behavioral health into broader medical care and focusing on upfront prevention rather than solely on treatment for large populations. Primary care and specialist medical providers are busy, do not have straightforward access to behavioral treatment for their patients, and patients are often not compliant even if referred for behavioral health services.<sup>5</sup> While behavioral health issues result in massive direct and indirect costs, there is a relative shortage in the mental health workforce to treat them. In primary care settings, this shortage is even greater.<sup>11,12</sup> Most current behavioral treatment models involve face-to-face sessions and are delivered individually, making it difficult to scale them adequately to address increased demand.

Cognitive behavioral therapy (CBT) is the most studied type of behavioral health intervention approach for anxiety, focused on modifying “maladaptive patterns of thinking and behavior to improve mood and coping.”<sup>13</sup> CBT is time-limited, problem-focused, and involves between-session practice of new skills. As a learning-based intervention, practice of CBT skills improves symptoms and is associated with changes in brain metabolism.<sup>14,15</sup> CBT is the standard of care for many psychiatric disorders including depression, anxiety disorders, eating disorders, addiction, chronic pain, and sleeping disturbance (insomnia) across the spectrum of acuity.<sup>16-20</sup>

In the last fifteen years, there has been significant effort to provide CBT to be delivered via interactive online programs. The interest in digital CBT is intended to overcome the cost and access burdens of 1-to-1, in-person therapy. It was also seen as a better fit for individuals who, in the midst of emotional distress, may not be motivated to seek or remain in high burden treatments. Computerized or digital CBT programs have been shown to be effective in treating anxiety and depression in primary care settings in some<sup>21-24</sup> but not all studies.<sup>25, 26</sup> Digital CBT offers the advantage of convenience, accessibility, less stigma, and being less labor intensive than face-to-face therapy.<sup>27, 28</sup> While outcomes are promising with small trial populations for anxiety and depression, existing digital programs have struggled with engagement and adherence, making it difficult to scale to large populations effectively.<sup>25</sup> Digital CBT can be delivered as either guided or unguided with the highest retention rates and best outcomes involving some type of collaboration with a therapist or coach.<sup>29-33</sup> Taking advantage of technological advances for delivery of CBT via a mobile app offers advantages.<sup>34</sup> This study compares a novel guided cognitive behavioral program delivered via mobile app to medical treatment as usual in reducing anxiety and improving quality of life in adults in primary care practices.

## Objective

The primary aims of this study are to evaluate the feasibility, acceptability, and effectiveness of a mobile coach-facilitated cognitive behavioral program, Lantern, in adults with generalized anxiety in primary care settings. We hypothesize that integration of Lantern, a mobile cognitive behavioral program, for anxiety within primary care is more effective at reducing anxiety and improving quality of life than enhanced treatment as usual.

Primary objectives:

- 1) To show feasibility and acceptability of implementing Lantern in primary care settings in patients aged 20-65 who meet threshold anxiety criteria.
- 2) To evaluate effectiveness of Lantern for anxiety and quality of life at primary care practices compared to propensity-score matched controls at practices without the availability of this program over a 6 month period.

Secondary objectives

- 3) To evaluate the effectiveness of Lantern for improving quality of life and reducing medical utilization driven by behavioral health symptoms over 12 month period.

Tertiary (exploratory) objectives

- 4) To evaluate moderators of program effectiveness

## METHODS

**Trial Design:** This study is a prospective pragmatic two arm parallel comparison trial of Lantern (active) to treatment as usual (control) at four primary care sites. As this is a non-randomized trial, propensity-score matching is used at the level of primary care practices and by individual patients at control sites using TREND criteria. This trial will employ a mixed methods approach to include both quantitative and qualitative analytic methods for a richer contextual understanding of our study aims. Quantitative analyses will be conducted both within and between subjects. For qualitative analyses, semi-structured interviews will be administered with equal proportion of Lantern completers and non-completers. This trial protocol has been reviewed and approved by the Institutional Review Board at UPMC. The protocol is registered with ClinicalTrials.gov (NCT03035019).

**Figure 1.** Trial design, intervention, and end points

**Active Site**

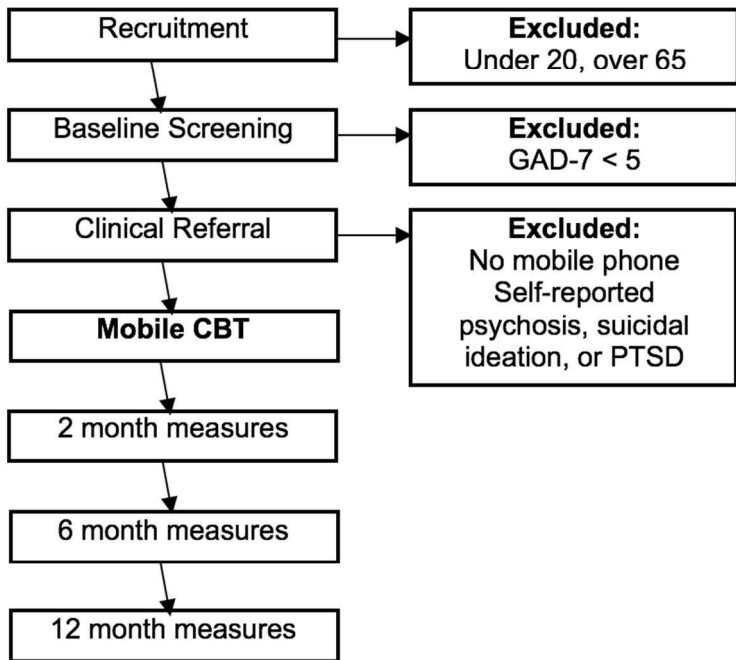

**Control Site**

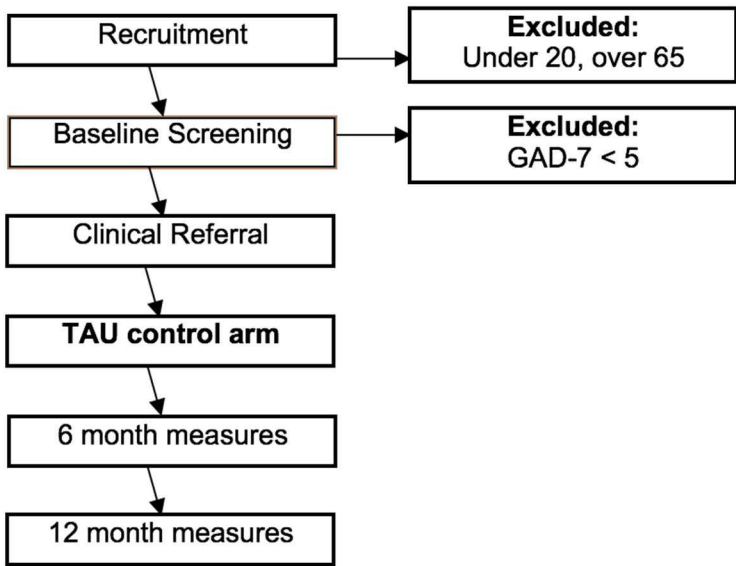

**Participants**

Patients are enrolled in the study from four primary care practices affiliated with a major academic institution. Patients are screened for anxiety using the Generalized Anxiety Disorder-7 Item Questionnaire (GAD-7) and quality of life using the 12-Item Short-Form Health Survey (SF-12) as part of their routine medical care. Patients who score  $\geq 5$  on the GAD-7 will be invited to participate in the study during their primary care clinic visit. Participants will not be reimbursed or incentivized for their study participation and will be provided access to Lantern, the mobile-delivered cognitive behavioral program, at no cost.



## Eligibility Criteria

Patients are eligible for this study if they are aged 20-65, endorse  $\geq 5$  on GAD-7, and have access to a smartphone or tablet. Patients are excluded from the study if (1) they are non-English speaking as the mobile CBT program is only available in English, (2) currently pregnant, (3) patients with acute back pain who are participating in a co-occurring study. If the patient is eligible for the study based on above criteria, then the primary care provider will further ascertain whether the patient is appropriate for Lantern. Primary care providers will be provided with information that patients with current suicidal ideation, current psychosis or psychotic disorders, or current PTSD should not be prescribed Lantern's anxiety program.

## Clinic Selection and Patient Recruitment

The four clinic sites were chosen based on a convenience sample having similar patient population characteristics and similar clinician willingness to participate.

At active sites, an electronic best-practice alert is generated to prompt clinic staff to obtain informed consent and to offer Lantern. If the patient consents, the physician orders Lantern through the electronic medical record. Participants are able to sign up for Lantern (by downloading the mobile app) at the time of the primary care clinic visit if they choose. Each participant will have access to Lantern for one year after enrollment.

At control sites, patients will be screened in the same way as those in the active sites. Informed consent process will not be required as the GAD-7 and SF-12 are part of routine clinical screening. These two measures will be obtained in a de-identified format from the control sites at baseline and over the next year. The mean number of visits at the control sites is 2.2 per year. Each control practice was provided with an educational brochure from NIMH about generalized anxiety disorder and its treatment and a list of three psychiatric practices in the area with availability to see patients within 2 months of referral which constitutes enhanced treatment as usual.

## Intervention

Lantern is based on empirically supported cognitive behavioral protocols for GAD,<sup>35-38</sup> developed in partnership with academic investigators to target symptoms of stress and anxiety for the general population. The content was developed based on the empirically-supported CBT model but optimized to drive engagement on the mobile platform (e.g., high quality audio, bite-sized content delivery, seamless user experience) and includes motivational behavioral coaching.

There are 6 core components within the Lantern anxiety program:

- 1) Education and awareness about anxiety and how thoughts, emotions, and behaviors are inter-related. This section provides the rationale for the cognitive behavioral model.
- 2) Relaxation- Participants learn several empirically supported relaxation techniques to manage anxiety.
- 3) Thoughts- Participants are guided on how to challenge their assumptions about these thoughts/stories and to create new stories.
- 4) Behavior change and exposure- Participants will learn how to avoid things that contribute to and/or maintain anxiety and identify adaptive coping activities. Through learning the principle of exposure, patients learn how systematic exposure to anxiety provoking situations can help to overcome anxiety in the long-term.
- 5) Mindfulness- This component is about learning to observe one's thoughts and feelings without judgment or attachment, which helps to interrupt the fused thought-feelings-behaviors cycle to promote a more flexible behavioral repertoire beyond anxiety-driven behaviors.
- 6) Habit formation/maintaining skills- Patients will reflect on what they have learned and work on making a habit out of the most effective techniques.

## Coaching Model

While the program is largely self-directed, coaches are integrated into the program to increase adherence using motivational techniques, answer questions, and humanize the experience. Coaches exchange short written messages with users through the app. The coaches have access to an internal coaching portal where they have a dashboard for each of their users. The dashboard includes all information the user inputs into the program including both their direct messages to coaches and all the content they have completed in the program.

All coaches are provided with training and supervision in CBT techniques, digital mental health, coaching methods, and risk management strategies. Coaches are trained to adhere to a standard risk protocol which includes recognizing signs of potential risk, expressing concern to the user, and referring to appropriate and study-specific additional services. Risk review is conducted daily whereby all user messages are read/reviewed for potential risk and appropriate steps are taken as per protocol.

## Study Risk Management Protocol

In addition to the above Lantern risk management protocol managed by coaches, additional procedures were established in accordance with the medical center, study PI, and the IRB. If any participant endorses  $\geq 15$  on the GAD-7 during follow up study or clinic assessments, primary care clinic staff will be notified via an electronic medical record alert and will also be alerted by the PI. The PI will also be notified when coaches activate the standard risk management protocol. Additionally, upon study entry, participants are encouraged to provide an emergency contact who the research team may contact in the event of worsening anxiety/psychiatric symptoms. Patients with worsening anxiety or those who experience other severe psychopathology will be offered appropriate medical management but not be removed from the study.

## Communication of Lantern progress to primary care providers

De-identified usage data (e.g. progression through the program, frequency of messages to coaches, frequency of session access, and techniques completed) is collected as part of the program. Lantern internally has a database that tracks user progress through the program. Using the unique study identifier assigned to each participant at the time of consent, this information can be combined with clinical measures tracked to the study coordinators who then generate progress reports sent to the physicians at each practice at regular intervals.

## **Outcomes**

Primary outcome:

- Feasibility/acceptability
- Anxiety symptom severity
- Quality of Life

Secondary Outcomes:

- Usability, Satisfaction, Helpfulness of Lantern program
- Medical Utilization

## **Data Collection/Measures**

Primary outcome assessments (GAD-7 and SF-12) will occur at baseline, 2 month (GAD-7 only at active sites), 6 and 12 months. Participants will be sent these measures electronically through secure email as part of their primary care access portal as well as emails sent within the Lantern app. For those patients who do not respond via email, research assistants blinded to their progress through the program will call to capture these assessments.

## **Table 1. Primary outcomes, secondary outcomes, and time points of collection**

|                                                     | Category                         | Measures                                                          | Baseline | 2 Mo. | 6 Mo. | 12 Mo. |
|-----------------------------------------------------|----------------------------------|-------------------------------------------------------------------|----------|-------|-------|--------|
| Demographics                                        | Predictor                        |                                                                   | ✓        |       |       |        |
| Chronic disease characterization                    | Predictor                        | Diagnoses based on ICD-10 coding in the electronic medical record | ✓        |       |       |        |
| Anxiety                                             | Primary Outcome                  | GAD-7                                                             | ✓        | ✓     | ✓     | ✓      |
| Quality of Life                                     | Primary Outcome                  | SF-12                                                             | ✓        |       | ✓     | ✓      |
| DSM-V Psychiatric Cross-Cutting Questionnaire       | Predictor                        |                                                                   | ✓        |       |       |        |
| Helpfulness/Satisfaction Questionnaire              | Secondary Outcome (Lantern only) |                                                                   |          |       | ✓     |        |
| Medical/Behavioral Health Utilization Questionnaire | Secondary Outcome (Lantern only) |                                                                   |          |       | ✓     | ✓      |

## Measures

**Demographics:** Date of birth, gender, ethnicity, race, insurance type, zip code as proxy for SES, will be extracted from the medical record

**Generalized anxiety symptom severity:** The GAD-7 is a 7-item validated self-report questionnaire used to identify probable cases of GAD and screening for the diagnosis of GAD according to DSM-IV criteria.<sup>39</sup> The questionnaire asks respondents to rate the degree to which they have experienced 7 core diagnostic features of GAD during the previous two weeks. Items are scored on a four-point Likert-type scale with a minimum score of 0 and maximum score of 3. Total scores (ranging from 0-21) are commonly categorized into four severity groups: minimal/no anxiety (0-4), mild (5-9), moderate (10-14), or severe (15-21). It is one of the most widely used anxiety measures in the U.S. in primary care and mental health care settings.

**Quality of Life:** The SF-12 is a 12-item validated self-report measure assessing one's perceived quality of life (adapted from SF-36).<sup>40</sup> The SF-12 is comprised of eight subscales describing health functioning: physical functioning, role limitations due to physical health problems, bodily pain, general health, energy/fatigue, social functioning, role limitations due to emotional problems, and mental health. Results are derived from two component summary scales: the Physical Component Summary (PCS-12) and Mental Component Summary (MCS-12), and are scored using norm-based methods. Both the PCS-12 and MCS-12 summary scores range

from 0 to 100 with a mean of 50 and SD = 10 in the general U.S. population. Thus, scores greater than 50 represent above average health status.

**DSM-V Level 1 Cross-Cutting Symptom Measure:** This is an informant rated measure that assesses mental health domains across psychiatric diagnoses.<sup>41, 42</sup> The measure consists of 23 questions that assess 13 psychiatric domains including depression, anger, mania, anxiety, somatic symptoms, suicidal ideation, psychosis, sleep problems, memory, repetitive thoughts and behaviors, dissociation, personality functioning and substance use. The measure was developed by consensus of experts by the American Psychiatric Association and was found to be clinically useful and to have good test-retest reliability in DSM-5 Field Trials that were conducted in adult clinical samples. Each item rates how much a subject was bothered by a specific symptom during the past two weeks with items being rated on a 5 point scale (0= none to 4= severe or nearly every day). This measure is only administered to patients with baseline GAD-7  $\geq$  10 at the Lantern sites.

**Medical Diagnoses and Utilization:** ICD10 code diagnoses, visit problem lists, smoking history, surgical history, medication history, and medical utilization. More specifically, medical utilization will include number of primary and specialty care outpatient visits, emergency room visits, and hospitalizations (number and days). Utilization information will be requested 1 year prior to enrollment and 2 years post study enrollment.

**Lantern Helpfulness and Satisfaction Scale:** This is a 14-item scale (Likert scale ranging from 1 = not at all to 7 = extremely) asking respondents to rate the helpfulness of the program; satisfaction with the program; evaluation of length of Lantern program; evaluation of the helpfulness of the Lantern coach; level of difficulty/effort to do the Lantern skills/assignments; and likelihood of recommending Lantern to family/friends.

**Behavioral Health Utilization:** This is a 14-item self-reported measure of past 6 month use of psychological treatments, psychotropic and pain management medications, hospitalization and emergency services collected at 6 and 12 months. This measure is only administered to the Lantern group.

**Lantern Utilization:** Usage metrics such as number of log-ins per day/week, number of sessions completed, frequency of messages sent to coach, etc. will be collected within the Lantern mobile app.

**Qualitative Interview Process (active sites only):** A subset of 24 participants who were offered Lantern will be asked to participate in an in-depth qualitative telephone interview at 6 months after enrollment. Participants will be randomly selected and be balanced to include both those who completed and did not complete the program. The interviews will be conducted by research staff contacting the randomly selected participants. The qualitative interview will explore the participant's experience with the program and areas of suggested improvement. All interviews will be audio-recorded and transcribed verbatim for analysis.

## Statistical Methods

### Sample size and power calculation

We expect 1,200 patients will meet entry criteria, with 600 from control and 600 from Lantern sites. Of these, we expect approximately 50% attrition over 6 months (N=600, with 300 from control and 300 from Lantern sites). With N=1,200 (N=300 at each of four primary care practices), and an intra-cluster correlation of 0.20 within practices,<sup>43</sup> we will have 0.80 power to detect a between-group difference of  $d=0.43$  and 0.90 power to detect a between-group difference of  $d=0.49$ . With only N=150 at each of four sites (i.e., those with 6-month outcome data), we expect to have 0.80 power to detect a between-group difference of  $d=0.45$  and 0.90 power to detect a between-group difference of  $d=0.52$ . These moderate effect sizes are within the moderate range ( $d=0.40-0.60$ ) we hypothesize for Lantern versus enhanced care. All power analyses were performed using PASS version 13.0.8.

### Data Analysis

Prior to testing *a priori* hypotheses, we will use descriptive statistics and effect sizes to characterize and compare the Lantern and control samples overall and by clinic, including reporting the intra-cluster correlations (ICCs). Graphical displays will be used to visualize distributions and trajectories of change over time in order to

inform model specification. We will examine missing data frequencies and mechanisms at baseline and follow-up, and use multiple imputation to retain the full sample when possible. Because this is a non-randomized design, propensity score matching will be used to develop a matched sample of eligible Lantern and control participants with 6-month follow-up outcome data. Our strategy will be to consider all baseline characteristics that are potentially related to treatment for use in the propensity score model. We expect this will include age, gender, SF-12 Physical Component Summary score, in addition to any other clinic-level and individual level characteristics we observe to be important. To account for the small number of clinics, we will use propensity score cross-cluster matching as proposed by Leon (2013).<sup>44</sup> The parameter specifications (e.g., caliper width) and specific variables to be included in the propensity score model will be determined based on an iterative approach aimed at finding the best balance between finding matches and reducing bias. If the number of control patients is substantially smaller than the number of Lantern patients (or vice versa), we will consider using 1-2 matching to retain a larger sample.

Because treatment was provided at the clinic level, we will consider the impact of clinic in all analyses. For a *priori* hypothesis testing, we will use mixed-effects models for repeatedly measured outcomes. These models will include time, treatment, and the time by treatment interaction. A significant interaction will indicate that the trajectory of change in the outcome differs by treatment. To appropriately model the covariance structure, we will include a random subject effect nested within the random clinic effect. We will also test whether the effect of treatment on change over time differs by baseline symptom score by adding further interaction terms to the model. Both intent to treat and per-protocol analyses based on only those Lantern participants who completed an adequate dose of the treatment (50% of the program at 4 months) will be performed. Statistical programs SPSS and R will be used for all analyses.

For qualitative analysis, interview transcripts will be uploaded into Atlas.ti, a program for qualitative analysis and thematic codes will be developed inductively. Trained coders will create codes based on content, relevance, and prevalence of themes and use codes to develop analytic categories. Atlas.ti's query tools will be reviewed for common themes.

### **Data Collection, management and confidentiality**

A secure database maintained within the Institution's firewall will store all the data collected in a de-identified way. All analyses will be completed by a study-independent statistician. Data at the practices will be collected in two ways: 1) aggregate de-identified reports of all screened patients at each site (active and control) by an honest broker. 2) De-identified data for individual consented patients at each site.

### **Safety**

Several steps were taken to minimize breach in participant confidentiality including the use of de-identified study identifiers, keeping all data behind the UPMC firewall, securing all hard copy data in locked file cabinets and electronic data in password protected files. Participant medical record information will be stored in an honest broker database. Several steps will be taken to monitor for adverse events. Patient progress will be monitored by clinical staff and the Principal Investigator (PI). Lantern coaches follow a risk management plan and communicate with the PI and the research team for any participant concerns. If at any time in the study a participant is judged to be experiencing adverse events such as severe depression or suicidality, the event will be recorded and a treatment escalation plan implemented. For patients with significantly worsening anxiety (GAD7 score > 15), the PI will be notified and communicate with the clinical team. For Lantern sites, the clinical team will receive regular updates in the electronic medical record of participants' progression in Lantern and GAD7 scores at baseline and 6 months.

### **Ethical Considerations**

This study obtained ethics and human subject research approval through the University of Pittsburgh Medical School Institutional Review Board (protocol #16040173). Participants provided IRB-approved consent before taking part in this study. A data safety monitoring board is overseeing the trial data and ethics. There

1 are weekly meetings with the research team and bi-weekly meetings with the participating primary care  
2 practices.  
3

## 4 **Results**

5 This study began in July 2016 and is expected to end in July 2018.  
6

## 7 **Dissemination**

8 The results of this study will be communicated to the participating primary care practices and published in peer  
9 reviewed publications and presented at national and international clinical and scientific conferences/meetings.  
10

## 11 **Discussion**

12 Common behavioral health disorders, such as depression and anxiety, remain inadequately addressed with  
13 evidence-based care and treatments. Less than half of patients with common behavioral health conditions  
14 receive evidence-based treatment, such as cognitive behavioral interventions.<sup>45</sup> Self-directed and coach-  
15 supported online delivery of a cognitive behavioral program for anxiety via a mobile app allows for the scalable  
16 provision of and access to evidence-based care. This paper presents a description of the pragmatic research  
17 methods to evaluate the integration of a mobile-delivered cognitive behavioral program into primary care and  
18 the impact on anxiety symptoms and quality of life among adult patients. Much research in this field is currently  
19 evaluating the application of online guided cognitive behavioral program into routine care settings.<sup>45</sup> As such,  
20 the findings from this study will add value to the evidence base through translation of research into a real-world  
21 practice setting with an optimal balance of internal and external validity.  
22

23 The findings will need to be evaluated and interpreted in light of the following limitations of the study design.  
24 Given the non-randomized design, the potential influence of factors such as clinic setting and provider  
25 differences cannot be controlled for through randomization. However, the propensity score matching methods  
26 will allow for minimizing these differences at baseline to distill the effects of Lantern and results will be  
27 interpreted in the context of these limitations. Another limitation is the lack of standardization and measurement  
28 of how primary care providers prescribe/recommend Lantern to their patients. Uptake of Lantern by primary  
29 care patients is likely driven in part by the interaction with their primary care provider and we will have limited  
30 data to systematically evaluate these potential effects.  
31

## 32 **Conclusion**

33 This novel mobile coached cognitive behavioral program is a scalable modality for delivering evidence-based  
34 behavioral care in the primary care setting. This study will provide evidence for the effectiveness of Lantern on  
35 anxiety symptoms and quality of life while also informing future improvements to scale and implement Lantern  
36 in primary care through understanding provider and patient uptake of Lantern.  
37

38 **Funding:** This research was funded by UPMC Enterprises. This research received no specific grant from any  
39 funding agency in the public, commercial or not-for-profit sectors.  
40

41 **Acknowledgements:** This research is being conducted by the authors as part of their employment at  
42 University of Pittsburgh Medical Center, University of Pittsburgh Enterprises, and Thrive Network, Inc. The  
43 authors would like to acknowledge the contributions of Meredith Strassburger, Katheryn Mcauliff, Carolyn  
44 Knorr, Dawn Priolo, and Jessica Yu. We also thank all of the participants who took part in this research study.  
45

46 **Contributors:** Eva Szigethy, Francis Solano, Megan Jones Bell conceived of this study. Dina L. Perry,  
47 Megan Oser, Eva Szigethy and Meredith Wallace contributed to the study design. Megan Oser, Lauren  
48 Morrell, Dina Perry, Katie Scott, and Eva Szigethy were instrumental in their contributions with implementation.  
49 Meredith Wallace provided statistical expertise in the trial design and will conduct the statistical analyses. All  
50 authors approved the final manuscript.  
51

## References

1. Kessler RC, Wang PS. The descriptive epidemiology of commonly occurring mental disorders in the United States. *Annu Rev Public Health* 2008;29:115-29.
2. Geraedts AS, Fokkema M, Kleiboer AM, et al. The longitudinal prediction of costs due to health care uptake and productivity losses in a cohort of employees with and without depression or anxiety. *J Occup Environ Med* 2014;56:794-801.
3. Simon G, Ormel J, VonKorff M, et al. Health care costs associated with depressive and anxiety disorders in primary care. *Am J Psychiatry* 1995;152:352-7.
4. Olfson M, Kroenke K, Wang S, et al. Trends in office-based mental health care provided by psychiatrists and primary care physicians. *J Clin Psychiatry* 2014;75:247-53.
5. Kroenke K, Unutzer J. Closing the False Divide: Sustainable Approaches to Integrating Mental Health Services into Primary Care. *J Gen Intern Med* 2017;32:404-410.
6. Bajor LA, Gunzler D, Einstadter D, et al. Associations between comorbid anxiety, diabetes control, and overall medical burden in patients with serious mental illness and diabetes. *Int J Psychiatry Med* 2015;49:309-20.
7. Katon W, Lin EH, Kroenke K. The association of depression and anxiety with medical symptom burden in patients with chronic medical illness. *Gen Hosp Psychiatry* 2007;29:147-55.
8. Rollman BL, Huffman JC. Treating anxiety in the presence of medical comorbidity: calmly moving forward. *Psychosom Med* 2013;75:710-2.
9. Pietrzak RH, Kinley J, Afifi TO, et al. Subsyndromal depression in the United States: prevalence, course, and risk for incident psychiatric outcomes. *Psychol Med* 2013;43:1401-14.
10. Roy-Byrne P, Katon W, Broadhead WE, et al. Subsyndromal ("mixed") anxiety--depression in primary care. *J Gen Intern Med* 1994;9:507-12.
11. Kroenke K, Spitzer RL, Williams JB, et al. Anxiety disorders in primary care: prevalence, impairment, comorbidity, and detection. *Ann Intern Med* 2007;146:317-25.
12. Blount FA, Miller BF. Addressing the workforce crisis in integrated primary care. *J Clin Psychol Med Settings* 2009;16:113-9.
13. Erickson TM, Newman MG. Cognitive behavioral psychotherapy for generalized anxiety disorder: a primer. *Expert Rev Neurother* 2005;5:247-57.
14. Kennedy SH, Konarski JZ, Segal ZV, et al. Differences in brain glucose metabolism between responders to CBT and venlafaxine in a 16-week randomized controlled trial. *Am J Psychiatry* 2007;164:778-88.
15. Fonzo GA, Ramsawh HJ, Flagan TM, et al. Cognitive-behavioral therapy for generalized anxiety disorder is associated with attenuation of limbic activation to threat-related facial emotions. *J Affect Disord* 2014;169:76-85.
16. Riper H, Andersson G, Hunter SB, et al. Treatment of comorbid alcohol use disorders and depression with cognitive-behavioural therapy and motivational interviewing: a meta-analysis. *Addiction* 2014;109:394-406.
17. Ehde DM, Dillworth TM, Turner JA. Cognitive-behavioral therapy for individuals with chronic pain: efficacy, innovations, and directions for research. *Am Psychol* 2014;69:153-66.
18. Olthuis JV, Watt MC, Bailey K, et al. Therapist-supported Internet cognitive behavioural therapy for anxiety disorders in adults. *Cochrane Database Syst Rev* 2016;3:Cd011565.
19. Edinger JD, Wohlgemuth WK, Radtke RA, et al. Cognitive behavioral therapy for treatment of chronic primary insomnia: a randomized controlled trial. *Jama* 2001;285:1856-64.
20. Spielmans GI, Benish SG, Marin C, et al. Specificity of psychological treatments for bulimia nervosa and binge eating disorder? A meta-analysis of direct comparisons. *Clin Psychol Rev* 2013;33:460-9.
21. Andrews G, Newby JM, Williams AD. Internet-delivered cognitive behavior therapy for anxiety disorders is here to stay. *Curr Psychiatry Rep* 2015;17:533.
22. Reger MA, Gahm GA. A meta-analysis of the effects of internet- and computer-based cognitive-behavioral treatments for anxiety. *J Clin Psychol* 2009;65:53-75.
23. Vallury KD, Jones M, Oosterbroek C. Computerized Cognitive Behavior Therapy for Anxiety and Depression in Rural Areas: A Systematic Review. *J Med Internet Res* 2015;17:e139.

24. Kaltenthaler E, Parry G, Beverley C, et al. Computerised cognitive-behavioural therapy for depression: systematic review. *Br J Psychiatry* 2008;193:181-4.
25. Gilbody S, Littlewood E, Hewitt C, et al. Computerised cognitive behaviour therapy (cCBT) as treatment for depression in primary care (REEACT trial): large scale pragmatic randomised controlled trial. *Bmj* 2015;351:h5627.
26. So M, Yamaguchi S, Hashimoto S, et al. Is computerised CBT really helpful for adult depression?-A meta-analytic re-evaluation of CCBT for adult depression in terms of clinical implementation and methodological validity. *BMC Psychiatry* 2013;13:113.
27. Berger M, Wagner TH, Baker LC. Internet use and stigmatized illness. *Soc Sci Med* 2005;61:1821-7.
28. Gega L, Marks I, Mataix-Cols D. Computer-aided CBT self-help for anxiety and depressive disorders: experience of a London clinic and future directions. *J Clin Psychol* 2004;60:147-57.
29. Richards D, Richardson T. Computer-based psychological treatments for depression: a systematic review and meta-analysis. *Clin Psychol Rev* 2012;32:329-42.
30. Spek V, Cuijpers P, Nyklicek I, et al. Internet-based cognitive behaviour therapy for symptoms of depression and anxiety: a meta-analysis. *Psychol Med* 2007;37:319-28.
31. Wright JH, Wright AS, Albano AM, et al. Computer-assisted cognitive therapy for depression: maintaining efficacy while reducing therapist time. *Am J Psychiatry* 2005;162:1158-64.
32. Kenardy JA, Dow MG, Johnston DW, et al. A comparison of delivery methods of cognitive-behavioral therapy for panic disorder: an international multicenter trial. *J Consult Clin Psychol* 2003;71:1068-75.
33. Mohr DC, Tomasino KN, Lattie EG, et al. IntelliCare: An Eclectic, Skills-Based App Suite for the Treatment of Depression and Anxiety. *J Med Internet Res* 2017;19:e10.
34. Fairburn CG, Patel V. The impact of digital technology on psychological treatments and their dissemination. *Behav Res Ther* 2017;88:19-25.
35. Newman MG. Recommendations for a cost-offset model of psychotherapy allocation using generalized anxiety disorder as an example. *J Consult Clin Psychol* 2000;68:549-55.
36. Newman MG, Przeworski A, Consoli AJ, et al. A randomized controlled trial of ecological momentary intervention plus brief group therapy for generalized anxiety disorder. *Psychotherapy (Chic)* 2014;51:198-206.
37. Newman MG, Borkovec, TD. Cognitive behavioral treatment of generalized anxiety disorder. *Clin Psychol Rev* 1995;48:5-7.
38. Newman M. Generalized anxiety disorder. In: Hersen M, M B, eds. *Effective Brief Therapies: A clinician's guide*. San Diego, CA: Academic Press, 2000:157-178.
39. Spitzer RL, Kroenke K, Williams JB, et al. A brief measure for assessing generalized anxiety disorder: the GAD-7. *Arch Intern Med* 2006;166:1092-7.
40. Gandek B, Ware JE, Aaronson NK, et al. Cross-validation of item selection and scoring for the SF-12 Health Survey in nine countries: results from the IQOLA Project. *International Quality of Life Assessment*. *J Clin Epidemiol* 1998;51:1171-8.
41. Narrow WE, Clarke DE, Kuramoto SJ, et al. DSM-5 field trials in the United States and Canada, Part III: development and reliability testing of a cross-cutting symptom assessment for DSM-5. *Am J Psychiatry* 2013;170:71-82.
42. Clarke D, Kuhl E. DSM-5 cross cutting symptom measures: a step towards the future of psychiatric care? *World Psychiatry* 2014;13:314-316.
43. Adams G, Gulliford MC, Ukoumunne OC, et al. Patterns of intra-cluster correlation from primary care research to inform study design and analysis. *J Clin Epidemiol* 2004;57:785-94.
44. Leon AC, Demirtas H, Li C, et al. Subject-level matching for imbalance in cluster randomized trials with a small number of clusters. *Pharm Stat* 2013;12:268-74.
45. Cuijpers P, Kleiboer A, Karyotaki E, et al. Internet and mobile interventions for depression: Opportunities and challenges. *Depress Anxiety* 2017;34:596-602.



# BMJ Open

**A study protocol for a non-randomized comparison trial evaluating the feasibility and effectiveness of a mobile cognitive behavioral program with integrated coaching for anxious adults in primary care.**

|                                 |                                                                                                                                                                                                                                                                                                                                                                                                                                                                                                                                                                  |
|---------------------------------|------------------------------------------------------------------------------------------------------------------------------------------------------------------------------------------------------------------------------------------------------------------------------------------------------------------------------------------------------------------------------------------------------------------------------------------------------------------------------------------------------------------------------------------------------------------|
| Journal:                        | <i>BMJ Open</i>                                                                                                                                                                                                                                                                                                                                                                                                                                                                                                                                                  |
| Manuscript ID                   | bmjopen-2017-019108.R1                                                                                                                                                                                                                                                                                                                                                                                                                                                                                                                                           |
| Article Type:                   | Protocol                                                                                                                                                                                                                                                                                                                                                                                                                                                                                                                                                         |
| Date Submitted by the Author:   | 09-Nov-2017                                                                                                                                                                                                                                                                                                                                                                                                                                                                                                                                                      |
| Complete List of Authors:       | Szigethy, Eva; University of Pittsburgh, Department of Psychiatry and Medicine<br>Solano, Francis; University of Pittsburgh, Department of Internal Medicine<br>Wallace, Meredith; University of Pittsburgh<br>Perry, Dina; University of Pittsburgh Medical Center Health System, Health Services Division<br>Morrell, Lauren ; Thrive Network, Inc.<br>Scott, Kathryn; University of Pittsburgh Medical Center Enterprises<br>Jones Bell, Megan; Stanford University, Department of Psychiatry and Behavioral Sciences<br>Oser, Megan; Thrive Network, Inc., ; |
| <b>Primary Subject Heading</b>: | Mental health                                                                                                                                                                                                                                                                                                                                                                                                                                                                                                                                                    |
| Secondary Subject Heading:      | Evidence based practice, General practice / Family practice, Patient-centred medicine                                                                                                                                                                                                                                                                                                                                                                                                                                                                            |
| Keywords:                       | PRIMARY CARE, anxiety, quality of life, cognitive behavioral, mHealth, digital health                                                                                                                                                                                                                                                                                                                                                                                                                                                                            |
|                                 |                                                                                                                                                                                                                                                                                                                                                                                                                                                                                                                                                                  |

SCHOLARONE™  
Manuscripts

**A study protocol for a non-randomized comparison trial evaluating the feasibility and effectiveness of a mobile cognitive behavioral program with integrated coaching for anxious adults in primary care.**

Eva Szigethy, MD, PhD, Francis Solano, MD, Meredith Wallace, PhD, Dina L. Perry, MBA, Lauren Morrell, BA, Kathryn Scott, MA, Megan Jones Bell, PsyD; Megan Oser, PhD

Eva Szigethy, Professor of Psychiatry, Medicine, & Pediatrics, Department of Psychiatry and Medicine, University of Pittsburgh, 3708 Fifth Avenue, 4<sup>th</sup> Floor, Pittsburgh, PA 15213; Francis Solano, Professor, Department of Internal Medicine, University Center, Suite 100A, 120 Lytton Ave, University of Pittsburgh, Pittsburgh, PA; 15213; Meredith Wallace, Assistant Professor, Department of Psychiatry and Medicine, 3811 O'Hara St., University of Pittsburgh, Pittsburgh, PA, 15213; Dina L. Perry, MBA, Executive Administrator II, UPMC Health Services Division, UPMC Community Medicine Inc., Renaissance Family Practice UPMC, 3600 Forbes Avenue, Forbes Tower, 9035, Pittsburgh, PA 15213; Lauren Morrell, Director of Partnerships, Lantern, 2 Shaw Alley, San Francisco, CA; Kathryn Scott, Director of Product Management, Consumer Health UPMC Enterprises, Bakery Square, Suite 200 6425 Penn Avenue, Pittsburgh, PA 15206; Megan Jones Bell, Consulting Assistant Professor, Department of Psychiatry and Behavioral Sciences, 401 Quarry Road, Stanford University, Stanford, CA; Megan Oser, Director of Research, Lantern, 2 Shaw Alley, San Francisco, CA.

Correspondence to: Megan Oser, PhD; [moser@golantern.com](mailto:moser@golantern.com)

1 **Copyright:** The Corresponding Author has the right to grant on behalf of all authors and does grant on behalf  
2 of all authors, an exclusive licence on a worldwide basis to the BMJ Publishing Group Ltd to permit this article  
3 (if accepted) to be published in BMJ editions and any other BMJ PGL products and sub-licences such use and  
4 exploit all subsidiary rights, as set out in our license.  
5

6 **Competing Interest Statement:** All authors have completed the Unified Competing Interest form (available  
7 on request from the corresponding author) and declare: no outside support from any organisation for the  
8 submitted work; Dr. Szigethy reports grants from NIH, personal fees from Abbvie Consultant, personal fees  
9 from Sherman Prize, personal fees from APPI. Dr. Jones Bell, Dr. Oser, and Lauren Morrell report being a  
10 shareholder in Thrive Network Inc (DBA, Lantern). Kathryn Scott, MA is employed by UPMC Enterprises and  
11 UPMC Enterprises is an investor in Thrive Network, Inc. Dr. Solano, Dr. Wallace, and Dina Perry have nothing  
12 to disclose. No other relationships or activities that could appear to have influenced the submitted work.  
13  
14

15 **Transparency Declaration:** Dr. Szigethy, the lead author (the manuscript's guarantor) affirms that the  
16 manuscript is an honest, accurate, and transparent account of the study being reported; that no important  
17 aspects of the study have been omitted; and that any discrepancies from the study as planned (and, if relevant,  
18 registered) have been explained.  
19  
20  
21  
22  
23  
24  
25  
26  
27  
28  
29  
30  
31  
32  
33  
34  
35  
36  
37  
38  
39  
40  
41  
42  
43  
44  
45  
46  
47  
48  
49  
50  
51  
52  
53  
54  
55  
56  
57  
58  
59  
60

**ABSTRACT**

**Introduction:** Generalized anxiety disorder (GAD) and subclinical GAD are highly prevalent in primary care. Unmanaged anxiety worsens quality of life in patients seen in primary care practices and leads to increased medical utilization and costs. Programs that teach patients cognitive behavioral therapy (CBT) techniques have been shown to improve anxiety and to prevent the evolution of anxiety symptoms to disorders but access and engagement have hampered integration of CBT into medical settings.

**Methods and Analysis:** This pragmatic study takes place in University of Pittsburgh Medical Center primary care practices to evaluate a coach supported mobile cognitive behavioral program (Lantern) on anxiety symptoms and quality of life. Clinics were non-randomly assigned to either enhanced treatment as usual or Lantern. All clinics provide electronic screening for anxiety and, within clinics assigned to Lantern, patients meeting a threshold level of mild anxiety (i.e.,  $\geq 5$  on GAD7) are referred to Lantern. The first study phase is aimed at establishing feasibility, acceptability, and effectiveness. The second phase focuses on long-term impact on psychosocial outcomes, healthcare utilization, and clinic/provider adoption/sustainable implementation using a propensity score matched parallel group study design. Primary outcomes are changes in anxiety symptoms (GAD7) and quality of life (SF-12) between baseline and 6-month follow-ups, comparing control and intervention. Secondary outcomes include provider and patient satisfaction, patient engagement, durability of changes in anxiety symptoms and quality of life over 12 months and the impact of Lantern on healthcare utilization over 12 months. Patients from control sites will be matched to the patients who utilize the mobile app. Trial Registration: <https://clinicaltrials.gov/ct2/show/NCT03035019>.

**Ethics and Dissemination:** Ethics and human subject research approval were obtained. A data safety monitoring board is overseeing trial data and ethics. Results will be communicated to participating primary care practices, published, and presented at clinical and scientific conferences.

Word Count: 298

## Strengths and Limitations of the Study (bullet points)

### Strengths

- First study evaluating a coach-guided cognitive behavioral program delivered via mobile app in primary care
- Pragmatic two arm parallel comparison effectiveness study design to allow for the evaluation of a digital behavioral intervention in primary care settings with minimal research infrastructure in place
- Screening and usage of digital intervention being tested are integrated into electronic health record
- Detailed characterization of a large primary care population to understand who engages and uses mobile app-based CBT
- Propensity score matching of patients from comparison primary care sites without access to the digital CBT intervention.

### Limitations

- Lack of randomization of the sample.
- With the absence of research-related facilitators of study recruitment (e.g., subject payments, research assistant facilitated recruitment), there may be high rates of missing data and completer rates may be smaller than in typical efficacy trials.
- Few clinics were used as the site of patient recruitment potentially limiting generalizability of the findings.

## INTRODUCTION

Behavioral health conditions are among the most prevalent health problems in the U.S. population with a lifetime prevalence of 46.4%.<sup>1</sup> Depression and anxiety disorders are the most common psychiatric disorders in the general population and major drivers of healthcare costs.<sup>2,3</sup> In fact, it is in the primary care setting that most mental health disorders are addressed and treated.<sup>4,5</sup> In the subset of patients with chronic medical conditions, behavioral health issues are even more common and costly.<sup>6-8</sup> These rates are likely even higher since less acute patients may not seek care outright, seeing themselves only as “stressed,” leaving them undercounted.<sup>9,10</sup>

Over the past several years, there have been two broad shifts in behavioral health: integrating behavioral health into broader medical care and focusing on upfront prevention rather than solely on treatment for large populations. Primary care and specialist medical providers are busy, do not have straightforward access to behavioral treatment for their patients, and patients are often not compliant even if referred for behavioral health services.<sup>5</sup> While behavioral health issues result in massive direct and indirect costs, there is a relative shortage in the mental health workforce to treat them. In primary care settings, this shortage is even greater.<sup>11,12</sup> Most current behavioral treatment models involve face-to-face sessions and are delivered individually, making it difficult to scale them adequately to address increased demand.

Cognitive behavioral therapy (CBT) is the most studied type of behavioral health intervention approach for anxiety, focused on modifying “maladaptive patterns of thinking and behavior to improve mood and coping.”<sup>13</sup> CBT is time-limited, problem-focused, and involves between-session practice of new skills. As a learning-based intervention, practice of CBT skills improves symptoms and is associated with changes in brain metabolism.<sup>14,15</sup> CBT is the standard of care for many psychiatric disorders including depression, anxiety disorders, eating disorders, addiction, chronic pain, and sleeping disturbance (insomnia) across the spectrum of acuity.<sup>16-20</sup>

In the last fifteen years, there has been significant effort to provide CBT to be delivered via interactive online programs. The interest in digital CBT is intended to overcome the cost and access burdens of 1-to-1, in-person therapy. It was also seen as a better fit for individuals who, in the midst of emotional distress, may not be motivated to seek or remain in high burden treatments. Computerized or digital CBT programs have been shown to be effective in treating anxiety and depression in primary care settings in some<sup>21-24</sup> but not all studies.<sup>25,26</sup> Digital CBT offers the advantage of convenience, accessibility, less stigma, and being less labor intensive than face-to-face therapy.<sup>27,28</sup> While outcomes are promising with small trial populations for anxiety and depression, existing digital programs have struggled with engagement and adherence, making it difficult to

scale to large populations effectively.<sup>25</sup> Digital CBT can be delivered as either guided or unguided with the highest retention rates and best outcomes involving some type of collaboration with a therapist or coach.<sup>29-33</sup> Taking advantage of technological advances for delivery of CBT via a mobile app offers advantages.<sup>34</sup> This study compares a novel guided cognitive behavioral program delivered via mobile app to medical treatment as usual in reducing anxiety and improving quality of life in adults in primary care practices.

## Objective

The primary aims of this study are to evaluate the feasibility, acceptability, and effectiveness of a mobile coach-facilitated cognitive behavioral program, Lantern, in adults with generalized anxiety in primary care settings. We hypothesize that integration of Lantern, a mobile cognitive behavioral program, for anxiety within primary care is more effective at reducing anxiety and improving quality of life than enhanced treatment as usual.

### Primary objectives:

- 1) To show feasibility and acceptability of implementing Lantern in primary care settings in patients aged 20-65 who meet threshold anxiety criteria.
- 2) To evaluate effectiveness of Lantern for anxiety and quality of life at primary care practices compared to propensity-score matched controls at practices without the availability of this program over a 6 month period.

### Secondary objectives

- 3) To evaluate the effectiveness of Lantern for improving quality of life and reducing medical utilization driven by behavioral health symptoms over 12 month period.

### Tertiary (exploratory) objectives

- 4) To evaluate moderators of program effectiveness

## METHODS

**Trial Design:** This study is a prospective pragmatic two arm parallel comparison trial of Lantern (active) to treatment as usual (control) at four primary care sites (see Figure 1). As this is a non-randomized trial, propensity-score matching is used at the level of primary care practices and by individual patients at control sites using TREND criteria. This trial will employ a mixed methods approach to include both quantitative and qualitative analytic methods for a richer contextual understanding of our study aims. Quantitative analyses will be conducted both within and between subjects. For qualitative analyses, semi-structured interviews will be administered with equal proportion of Lantern completers and non-completers. This trial protocol has been reviewed and approved by the Institutional Review Board at UPMC. The protocol is registered with ClinicalTrials.gov (NCT03035019).

## Participants

Patients are enrolled in the study from four primary care practices affiliated with a major academic institution. Patients between 20-65 years of age are screened for anxiety using the Generalized Anxiety Disorder-7 Item Questionnaire (GAD-7) and quality of life using the 12-Item Short-Form Health Survey (SF-12) as part of their routine medical care. Patients who score  $\geq 5$  on the GAD-7 will be invited to participate in the study during their primary care clinic visit (see Figure 1). Participants will not be reimbursed or incentivized for their study participation but will be provided access to Lantern, the mobile-delivered cognitive behavioral program, at no cost.

## Eligibility Criteria

Patients are eligible for this study if they are aged 20-65, endorse  $\geq 5$  on GAD-7, and have access to a smartphone or tablet.

## Clinic Selection and Patient Recruitment

The four clinic sites were chosen based on a convenience sample having similar patient population characteristics and similar clinician willingness to participate.

1 At active sites, an electronic best-practice alert is generated to prompt clinic staff to obtain informed consent  
2 and to offer Lantern. Active site patients with acute back pain who are participating in a co-occurring study are  
3 excluded. Active site patients who are scheduled for a pregnancy appointment are not screened for this study.  
4 If the patient is eligible for the study based on above criteria, then the primary care provider will further  
5 ascertain whether the patient is appropriate for Lantern. Primary care providers will be provided with guidelines  
6 that patients with current suicidal ideation, current psychosis or psychotic disorders, or current PTSD are not  
7 appropriate for this evaluation of Lantern's anxiety program. If the patient consents, the physician orders  
8 Lantern through the electronic medical record. Participants are able to sign up for Lantern (by downloading the  
9 mobile app) at the time of the primary care clinic visit if they choose. Each participant will have access to  
10 Lantern for two years after enrollment.  
11

12 At control sites, patients will be screened in the same way as those in the active sites. Informed consent  
13 process will not be required as the GAD-7 and SF-12 are part of routine clinical screening. These two  
14 measures will be obtained in a de-identified format from the control sites at baseline and over the next year.  
15 The mean number of visits at the control sites is 2.2 per year. Each control practice was provided with an  
16 educational brochure from NIMH about generalized anxiety disorder and its treatment and a list of three  
17 psychiatric practices in the area with availability to see patients within 3 months of referral which constitutes  
18 enhanced treatment as usual.  
19  
20

## 21 **Intervention**

22 Lantern is based on empirically supported cognitive behavioral protocols for GAD,<sup>35-38</sup> developed in partnership  
23 with academic investigators to target symptoms of stress and anxiety for the general population. The content  
24 was developed based on the empirically-supported CBT model but optimized to drive engagement on the  
25 mobile platform (e.g., high quality audio, bite-sized content delivery, seamless user experience) and includes  
26 motivational behavioral coaching.  
27

28 There are 6 core components within the Lantern anxiety program:

- 29 1) Education and awareness about anxiety and how thoughts, emotions, and behaviors are inter-related.  
30 This section provides the rationale for the cognitive behavioral model.
- 31 2) Relaxation- Participants learn several empirically supported relaxation techniques to manage anxiety.
- 32 3) Thoughts- Participants are guided on how to challenge their assumptions about these thoughts/stories  
33 and to create new stories.
- 34 4) Behavior change and exposure- Participants will learn the behavioral cycle of avoidance and how this  
35 maintains anxiety. Through learning the principle of exposure, patients learn how systematic exposure  
36 to anxiety provoking situations can help to overcome anxiety in the long-term.
- 37 5) Mindfulness- This component is about learning to observe one's thoughts and feelings without  
38 judgment or attachment, which helps to interrupt the fused thought-feelings-behaviors cycle to promote  
39 a more flexible behavioral repertoire beyond anxiety-driven behaviors.
- 40 6) Habit formation/maintaining skills- Patients will reflect on what they have learned and work on making a  
41 habit out of the most effective techniques.  
42

## 43 Coaching Model

44 While the program is largely self-directed, coaches are integrated into the program to increase adherence  
45 using motivational techniques, answer questions, and humanize the experience. Coaches exchange short  
46 written messages with users through the app. The coaches have access to an internal coaching portal where  
47 they have a dashboard for each of their users. The dashboard includes all information the user inputs into the  
48 program including both their direct messages to coaches and all the content they have completed in the  
49 program.  
50

51  
52 Lantern primarily employs Master's-level coaches with backgrounds in health and wellness coaching or mental  
53 health treatment. All coaches are provided with training and supervision by doctoral-level licensed clinical  
54 psychologists in CBT techniques, digital mental health, coaching methods, and risk management strategies.  
55 Coaches are trained to adhere to a standard risk protocol which includes recognizing signs of potential risk,  
56 expressing concern to the user, and referring to appropriate and study-specific additional services. Risk review  
57  
58  
59

is conducted daily whereby all user messages are read/reviewed for potential risk and appropriate steps are taken as per protocol.

### Study Risk Management Protocol

In addition to the above Lantern risk management protocol managed by coaches, additional procedures were established in accordance with the medical center, study PI, and the IRB. If any participant endorses  $\geq 15$  on the GAD-7 during follow up study or clinic assessments, primary care clinic staff will be notified via an electronic medical record alert and will also be alerted by the PI. The PI will also be notified when coaches activate the standard risk management protocol. Additionally, upon study entry, participants are encouraged to provide an emergency contact who the research team may contact in the event of worsening anxiety/psychiatric symptoms. Patients with worsening anxiety or those who experience other severe psychopathology will be offered appropriate medical management but not be removed from the study.

### Communication of Lantern progress to primary care providers

De-identified usage data (e.g. progression through the program, frequency of messages to coaches, frequency of session access, and techniques completed) is collected as part of the program. Lantern internally has a database that tracks user progress through the program. Using the unique study identifier assigned to each participant at the time of consent, this information can be combined with clinical measures tracked to the study coordinators who then generate progress reports sent to the physicians at each practice at regular intervals.

### **Outcomes**

#### Primary outcome:

- Feasibility/acceptability
- Anxiety symptom severity
- Quality of Life

#### Secondary Outcomes:

- Usability, Satisfaction, Helpfulness of Lantern program
- Medical Utilization

### **Data Collection/Measures**

At the active sites primary outcome assessments (GAD-7 and SF-12) will occur at baseline, 2, 6 and 12 months (see Table 1). At the active sites, participants will be sent these measures electronically through secure email. For those patients who do not respond via email, research assistants blinded to their progress through the program will contact participants to capture these assessments via telephone.

At the control sites, the GAD7 and SF12 questionnaires were provided to patients as part of routine care at each subsequent visit. The GAD7 and SF-12 assessments that are completed in clinic at 6 and 12 months will be utilized for this study (Table 1).

**Table 1. Primary outcomes, secondary outcomes, and time points of collection**

|                                  | Category  | Measures                                           | Baseline | 2 Mo. | 6 Mo. | 12 Mo. |
|----------------------------------|-----------|----------------------------------------------------|----------|-------|-------|--------|
| Demographics                     | Predictor |                                                    | ✓        |       |       |        |
| Chronic disease characterization | Predictor | Diagnoses based on ICD-10 coding in the electronic | ✓        |       |       |        |



|                                                     |                                  |                |   |     |   |   |
|-----------------------------------------------------|----------------------------------|----------------|---|-----|---|---|
|                                                     |                                  | medical record |   |     |   |   |
| Anxiety                                             | Primary Outcome                  | GAD-7          | ✓ | ✓ * | ✓ | ✓ |
| Quality of Life                                     | Primary Outcome                  | SF-12          | ✓ |     | ✓ | ✓ |
| DSM-V Psychiatric Cross-Cutting Questionnaire       | Predictor (Lantern only)         |                | ✓ |     |   |   |
| Helpfulness/Satisfaction Questionnaire              | Secondary Outcome (Lantern only) |                |   |     | ✓ |   |
| Medical/Behavioral Health Utilization Questionnaire | Secondary Outcome (Lantern only) |                |   |     | ✓ | ✓ |

Note. \* The 2 month GAD7 assessment only occurs for Active sites.

## Measures

**Demographics:** Date of birth, gender, ethnicity, race, insurance type, zip code as proxy for SES, will be extracted from the medical record

**Generalized anxiety symptom severity:** The GAD-7 is a 7-item validated self-report questionnaire used to identify probable cases of GAD and screening for the diagnosis of GAD according to DSM-IV criteria.<sup>39</sup> The questionnaire asks respondents to rate the degree to which they have experienced 7 core diagnostic features of GAD during the previous two weeks. Items are scored on a four-point Likert-type scale with a minimum score of 0 and maximum score of 3. Total scores (ranging from 0-21) are commonly categorized into four severity groups: minimal/no anxiety (0-4), mild (5-9), moderate (10-14), or severe (15-21). It is one of the most widely used anxiety measures in the U.S. in primary care settings<sup>40</sup>.

**Quality of Life:** The SF-12 is a 12-item validated self-report measure assessing one's perceived quality of life (adapted from SF-36).<sup>41</sup> The SF-12 is comprised of eight subscales describing health functioning: physical functioning, role limitations due to physical health problems, bodily pain, general health, energy/fatigue, social functioning, role limitations due to emotional problems, and mental health. Results are derived from two component summary scales: the Physical Component Summary (PCS-12) and Mental Component Summary (MCS-12), and are scored using norm-based methods. Both the PCS-12 and MCS-12 summary scores range from 0 to 100 with a mean of 50 and SD = 10 in the general U.S. population. Thus, scores greater than 50 represent above average health status.

**DSM-5 Level 1 Cross-Cutting Symptom Measure:** This is an informant rated measure that assesses mental health domains across psychiatric diagnoses.<sup>42,43</sup> The measure consists of 23 questions that assess 13 psychiatric domains including depression, anger, mania, anxiety, somatic symptoms, suicidal ideation, psychosis, sleep problems, memory, repetitive thoughts and behaviors, dissociation, personality functioning and substance use. The measure was developed by consensus of experts by the American Psychiatric Association and was found to be clinically useful and to have good test-retest reliability in DSM-5 Field Trials that were conducted in adult clinical samples. Each item rates how much a subject was bothered by a specific symptom during the past two weeks with items being rated on a 5 point scale (0= none to 4= severe or nearly every day). This measure is only administered to patients with baseline GAD-7  $\geq 10$  at the Lantern sites.

**Medical Diagnoses and Utilization:** ICD10 code diagnoses, visit problem lists, smoking history, surgical history, medication history, and medical utilization. More specifically, medical utilization will include number of primary and specialty care outpatient visits, emergency room visits, and hospitalizations (number and days). Utilization information will be requested 1 year prior to enrollment and 2 years post study enrollment.

**Lantern Helpfulness and Satisfaction Scale:** This is a 14-item scale (Likert scale ranging from 1 = not at all to 7 = extremely) asking respondents to rate the helpfulness of the program; satisfaction with the program; evaluation of length of Lantern program; evaluation of the helpfulness of the Lantern coach; level of difficulty/effort to do the Lantern skills/assignments; and likelihood of recommending Lantern to family/friends. It is adapted from the Client Satisfaction Questionnaire.<sup>44</sup>

**Behavioral Health Utilization:** This is a 14-item self-reported measure of past 6 month use of psychological treatments, psychotropic and pain management medications, hospitalization and emergency services collected at 6 and 12 months. It was adapted from the Cornell Services Index.<sup>45</sup> This measure is only administered to the Lantern group.

**Lantern Utilization:** Usage metrics such as number of log-ins per day/week, number of sessions completed, frequency of messages sent to coach, etc. will be collected within the Lantern mobile app.

**Qualitative Interview Process (active sites only):** A subset of 24 participants who were offered Lantern will be asked to participate in an in-depth qualitative telephone interview at 6 months after enrollment. Participants will be randomly selected and be balanced to include both those who completed and did not complete the program. The interviews will be conducted by research staff contacting the randomly selected participants. The semi-structured qualitative interview will explore participants' experience with and expectations of the Lantern program, including their experience with coaching, and areas of suggested improvement. All interviews will be audio-recorded and transcribed verbatim for analysis.

## Statistical Methods

### Sample size and power calculation

We expect 1,200 patients will meet entry criteria, with 600 from control and 600 from Lantern sites. Of these, we expect approximately 50% attrition over 6 months (N=600, with 300 from control and 300 from Lantern sites). With N=1,200 (N=300 at each of four primary care practices), and an intra-cluster correlation of 0.20 within practices,<sup>46</sup> we will have 0.80 power to detect a between-group difference of  $d=0.43$  and 0.90 power to detect a between-group difference of  $d=0.49$ . With only N=150 at each of four sites (i.e., those with 6-month outcome data), we expect to have 0.80 power to detect a between-group difference of  $d=0.45$  and 0.90 power to detect a between-group difference of  $d=0.52$ . These effect sizes are within the moderate range ( $d=0.40-0.60$ ) we hypothesize for Lantern versus enhanced care. All power analyses were performed using PASS version 13.0.8.

### Data Analysis

Feasibility and acceptability will be assessed using two criteria: (1) Among the first 50 patients, at least 50% of eligible participants meeting inclusion criteria should accept participation in the study; (2) At least 50% of participants that initiate Lantern will complete at least 3 techniques.

Prior to testing *a priori* hypotheses, we will use descriptive statistics and effect sizes to characterize and compare the Lantern and control samples overall and by clinic, including reporting the intra-cluster correlations (ICCs). Graphical displays will be used to visualize distributions and trajectories of change over time in order to inform model specification. We will examine missing data frequencies and mechanisms at baseline and follow-up, and use multiple imputation to retain the full sample when possible. Because this is a non-randomized design, propensity score matching will be used to develop a matched sample of eligible Lantern and control participants with 6-month follow-up outcome data. Our strategy will be to consider all baseline characteristics that are potentially related to treatment for use in the propensity score model. We expect this will include age, gender, SF-12 Physical Component Summary score, in addition to any other clinic-level and individual level

characteristics we observe to be important. To account for the small number of clinics, we will use propensity score cross-cluster matching as proposed by Leon (2013).<sup>47</sup> The parameter specifications (e.g., caliper width) and specific variables to be included in the propensity score model will be determined based on an iterative approach aimed at finding the best balance between finding matches and reducing bias. If the number of control patients is substantially smaller than the number of Lantern patients (or vice versa), we will consider using 1-2 matching to retain a larger sample.

Because treatment was provided at the clinic level, we will consider the impact of clinic in all analyses. For a *priori* hypothesis testing, we will use mixed-effects models for repeatedly measured outcomes. These models will include time, treatment, and the time by treatment interaction. A significant interaction will indicate that the trajectory of change in the outcome differs by treatment. To appropriately model the covariance structure, we will include a random subject effect nested within the random clinic effect. We will also test whether the effect of treatment on change over time differs by baseline symptom score by adding further interaction terms to the model. Both intent to treat and per-protocol analyses based on only those Lantern participants who completed an adequate dose of the treatment (50% of the program at 4 months) will be performed. Statistical programs SPSS and R will be used for all analyses.

For qualitative analysis, a thematic analytic approach will be used. Interview transcripts will be uploaded into Atlas.ti, a program for qualitative analysis and thematic codes will be developed inductively. Trained coders will create codes based on content, relevance, and prevalence of themes and use codes to develop analytic categories. Atlas.ti's query tools will be reviewed for common themes.

### **Data Collection, management and confidentiality**

A secure database maintained within the Institution's firewall will store all the data collected in a de-identified way. All analyses will be completed by a study-independent statistician. Data at the practices will be collected in two ways: 1) aggregate de-identified reports of all screened patients at each site (active and control) by an honest broker. 2) De-identified data for individual consented patients at each active site.

### **Safety**

Several steps were taken to minimize breach in participant confidentiality including the use of de-identified study identifiers, keeping all data behind the UPMC firewall, securing all hard copy data in locked file cabinets and electronic data in password protected files. Participant medical record information will be stored in an honest broker database. Several steps will be taken to monitor for adverse events. Patient progress will be monitored by clinical staff and the Principal Investigator (PI). Lantern coaches follow a risk management plan and communicate with the PI and the research team for any participant concerns. If at any time in the study a participant is judged to be experiencing adverse events such as severe depression or suicidality, the event will be recorded and a treatment escalation plan implemented. For patients with significantly worsening anxiety (GAD7 score > 15), the PI will be notified and communicate with the clinical team. For Lantern sites, the clinical team will receive regular updates in the electronic medical record of participants' progression in Lantern and GAD7 scores at baseline, 2 months, and 6 months.

### **Ethical Considerations**

This study obtained ethics and human subject research approval through the University of Pittsburgh Medical School Institutional Review Board (protocol #16040173). Participants provided IRB-approved consent before taking part in this study. A data safety monitoring board is overseeing the trial data and ethics. There are weekly meetings with the research team and bi-weekly meetings with the participating primary care practices.

### **Results**

This study began in July 2016 and is expected to end in July 2018.

### **Dissemination**

The results of this study will be communicated to the participating primary care practices and published in peer reviewed publications and presented at national and international clinical and scientific conferences/meetings.

## Discussion

Common behavioral health disorders, such as depression and anxiety, remain inadequately addressed with evidence-based care and treatments. Less than half of patients with common behavioral health conditions receive evidence-based treatment, such as cognitive behavioral interventions.<sup>48</sup> Self-directed and coach-supported online delivery of a cognitive behavioral program for anxiety via a mobile app allows for the scalable provision of and access to evidence-based care. This paper presents a description of the pragmatic research methods to evaluate the integration of a mobile-delivered cognitive behavioral program into primary care and the impact on anxiety symptoms and quality of life among adult patients. Much research in this field is currently evaluating the application of online guided cognitive behavioral program into routine care settings.<sup>48</sup> As such, the findings from this study will add value to the evidence base through translation of research into a real-world practice setting with an optimal balance of internal and external validity.

The findings will need to be evaluated and interpreted in light of the following limitations of the study design. Given the non-randomized design, the potential influence of factors such as clinic setting and provider differences cannot be controlled for through randomization. However, the propensity score matching methods will allow for minimizing these differences at baseline to distill the effects of Lantern and results will be interpreted in the context of these limitations. Another limitation is the limited standardization of how primary care providers prescribe/recommend Lantern to their patients. Uptake of Lantern by primary care patients is likely driven in part by the interaction with their primary care provider and we will have limited data to systematically evaluate these potential effects. Overall, this study will provide evidence for the effectiveness of Lantern on anxiety symptoms and quality of life while also informing future improvements to scale and implement Lantern in primary care.

**Funding:** This research was funded by UPMC Enterprises. This research received no specific grant from any funding agency in the public, commercial or not-for-profit sectors.

**Acknowledgements:** This research is being conducted by the authors as part of their employment at University of Pittsburgh Medical Center, University of Pittsburgh Enterprises, and Thrive Network, Inc. The authors would like to acknowledge the contributions of Meredith Strassburger, Katheryn Mcauliff, Carolyn Knorr, Dawn Priolo, and Jessica Yu. We also thank all of the participants who took part in this research study.

**Contributors:** Eva Szigethy, Francis Solano, Megan Jones Bell conceived of this study. Dina L. Perry, Megan Oser, Eva Szigethy and Meredith Wallace contributed to the study design. Megan Oser, Lauren Morrell, Dina Perry, Katie Scott, and Eva Szigethy were instrumental in their contributions with implementation. Meredith Wallace provided statistical expertise in the trial design and will conduct the statistical analyses. All authors approved the final manuscript.

Figure 1 Legend: Not applicable.

## References

1. Kessler RC, Wang PS. The descriptive epidemiology of commonly occurring mental disorders in the United States. *Annu Rev Public Health* 2008;29:115-29.
2. Geraedts AS, Fokkema M, Kleiboer AM, et al. The longitudinal prediction of costs due to health care uptake and productivity losses in a cohort of employees with and without depression or anxiety. *J Occup Environ Med* 2014;56:794-801.
3. Simon G, Ormel J, VonKorff M, et al. Health care costs associated with depressive and anxiety disorders in primary care. *Am J Psychiatry* 1995;152:352-7.
4. Olfson M, Kroenke K, Wang S, et al. Trends in office-based mental health care provided by psychiatrists and primary care physicians. *J Clin Psychiatry* 2014;75:247-53.
5. Kroenke K, Unutzer J. Closing the False Divide: Sustainable Approaches to Integrating Mental Health Services into Primary Care. *J Gen Intern Med* 2017;32:404-410.
6. Bajor LA, Gunzler D, Einstadter D, et al. Associations between comorbid anxiety, diabetes control, and overall medical burden in patients with serious mental illness and diabetes. *Int J Psychiatry Med* 2015;49:309-20.
7. Katon W, Lin EH, Kroenke K. The association of depression and anxiety with medical symptom burden in patients with chronic medical illness. *Gen Hosp Psychiatry* 2007;29:147-55.
8. Rollman BL, Huffman JC. Treating anxiety in the presence of medical comorbidity: calmly moving forward. *Psychosom Med* 2013;75:710-2.
9. Pietrzak RH, Kinley J, Afifi TO, et al. Subsyndromal depression in the United States: prevalence, course, and risk for incident psychiatric outcomes. *Psychol Med* 2013;43:1401-14.
10. Roy-Byrne P, Katon W, Broadhead WE, et al. Subsyndromal ("mixed") anxiety--depression in primary care. *J Gen Intern Med* 1994;9:507-12.
11. Kroenke K, Spitzer RL, Williams JB, et al. Anxiety disorders in primary care: prevalence, impairment, comorbidity, and detection. *Ann Intern Med* 2007;146:317-25.
12. Blount FA, Miller BF. Addressing the workforce crisis in integrated primary care. *J Clin Psychol Med Settings* 2009;16:113-9.
13. Erickson TM, Newman MG. Cognitive behavioral psychotherapy for generalized anxiety disorder: a primer. *Expert Rev Neurother* 2005;5:247-57.
14. Kennedy SH, Konarski JZ, Segal ZV, et al. Differences in brain glucose metabolism between responders to CBT and venlafaxine in a 16-week randomized controlled trial. *Am J Psychiatry* 2007;164:778-88.
15. Fonzo GA, Ramsawh HJ, Flagan TM, et al. Cognitive-behavioral therapy for generalized anxiety disorder is associated with attenuation of limbic activation to threat-related facial emotions. *J Affect Disord* 2014;169:76-85.
16. Riper H, Andersson G, Hunter SB, et al. Treatment of comorbid alcohol use disorders and depression with cognitive-behavioural therapy and motivational interviewing: a meta-analysis. *Addiction* 2014;109:394-406.
17. Ehde DM, Dillworth TM, Turner JA. Cognitive-behavioral therapy for individuals with chronic pain: efficacy, innovations, and directions for research. *Am Psychol* 2014;69:153-66.
18. Olthuis JV, Watt MC, Bailey K, et al. Therapist-supported Internet cognitive behavioural therapy for anxiety disorders in adults. *Cochrane Database Syst Rev* 2016;3:Cd011565.
19. Edinger JD, Wohlgemuth WK, Radtke RA, et al. Cognitive behavioral therapy for treatment of chronic primary insomnia: a randomized controlled trial. *Jama* 2001;285:1856-64.
20. Spielmans GI, Benish SG, Marin C, et al. Specificity of psychological treatments for bulimia nervosa and binge eating disorder? A meta-analysis of direct comparisons. *Clin Psychol Rev* 2013;33:460-9.
21. Andrews G, Newby JM, Williams AD. Internet-delivered cognitive behavior therapy for anxiety disorders is here to stay. *Curr Psychiatry Rep* 2015;17:533.
22. Reger MA, Gahm GA. A meta-analysis of the effects of internet- and computer-based cognitive-behavioral treatments for anxiety. *J Clin Psychol* 2009;65:53-75.
23. Vallury KD, Jones M, Oosterbroek C. Computerized Cognitive Behavior Therapy for Anxiety and Depression in Rural Areas: A Systematic Review. *J Med Internet Res* 2015;17:e139.

24. Kaltenthaler E, Parry G, Beverley C, et al. Computerised cognitive-behavioural therapy for depression: systematic review. *Br J Psychiatry* 2008;193:181-4.
25. Gilbody S, Littlewood E, Hewitt C, et al. Computerised cognitive behaviour therapy (cCBT) as treatment for depression in primary care (REEACT trial): large scale pragmatic randomised controlled trial. *Bmj* 2015;351:h5627.
26. So M, Yamaguchi S, Hashimoto S, et al. Is computerised CBT really helpful for adult depression?-A meta-analytic re-evaluation of CCBT for adult depression in terms of clinical implementation and methodological validity. *BMC Psychiatry* 2013;13:113.
27. Berger M, Wagner TH, Baker LC. Internet use and stigmatized illness. *Soc Sci Med* 2005;61:1821-7.
28. Gega L, Marks I, Mataix-Cols D. Computer-aided CBT self-help for anxiety and depressive disorders: experience of a London clinic and future directions. *J Clin Psychol* 2004;60:147-57.
29. Richards D, Richardson T. Computer-based psychological treatments for depression: a systematic review and meta-analysis. *Clin Psychol Rev* 2012;32:329-42.
30. Spek V, Cuijpers P, Nyklicek I, et al. Internet-based cognitive behaviour therapy for symptoms of depression and anxiety: a meta-analysis. *Psychol Med* 2007;37:319-28.
31. Wright JH, Wright AS, Albano AM, et al. Computer-assisted cognitive therapy for depression: maintaining efficacy while reducing therapist time. *Am J Psychiatry* 2005;162:1158-64.
32. Kenardy JA, Dow MG, Johnston DW, et al. A comparison of delivery methods of cognitive-behavioral therapy for panic disorder: an international multicenter trial. *J Consult Clin Psychol* 2003;71:1068-75.
33. Mohr DC, Tomasino KN, Lattie EG, et al. IntelliCare: An Eclectic, Skills-Based App Suite for the Treatment of Depression and Anxiety. *J Med Internet Res* 2017;19:e10.
34. Fairburn CG, Patel V. The impact of digital technology on psychological treatments and their dissemination. *Behav Res Ther* 2017;88:19-25.
35. Newman MG. Recommendations for a cost-offset model of psychotherapy allocation using generalized anxiety disorder as an example. *J Consult Clin Psychol* 2000;68:549-55.
36. Newman MG, Przeworski A, Consoli AJ, et al. A randomized controlled trial of ecological momentary intervention plus brief group therapy for generalized anxiety disorder. *Psychotherapy (Chic)* 2014;51:198-206.
37. Newman MG, Borkovec, TD. Cognitive behavioral treatment of generalized anxiety disorder. *Clin Psychol Rev* 1995;48:5-7.
38. Newman M. Generalized anxiety disorder. In: Hersen M, M B, eds. *Effective Brief Therapies: A clinician's guide*. San Diego, CA: Academic Press, 2000:157-178.
39. Spitzer RL, Kroenke K, Williams JB, et al. A brief measure for assessing generalized anxiety disorder: the GAD-7. *Arch Intern Med* 2006;166:1092-7.
40. Martinson A, Caner J, Sweeney R. Assessment of Anxiety in Primary Care. In Maruish, M. E. (Ed.). *Handbook of psychological assessment in primary care settings*. (2017): 319.
41. Gandek B, Ware JE, Aaronson NK, et al. Cross-validation of item selection and scoring for the SF-12 Health Survey in nine countries: results from the IQOLA Project. *International Quality of Life Assessment. J Clin Epidemiol* 1998;51:1171-8.
42. Narrow WE, Clarke DE, Kuramoto SJ, et al. DSM-5 field trials in the United States and Canada, Part III: development and reliability testing of a cross-cutting symptom assessment for DSM-5. *Am J Psychiatry* 2013;170:71-82.
43. Clarke D, Kuhl E. DSM-5 cross cutting symptom measures: a step towards the future of psychiatric care? *World Psychiatry* 2014;13:314-316.
44. Larsen DL, Attkisson CC, Hargreaves WA, Nguyen TD. Assessment of client/patient satisfaction: Development of a general scale. *Eval Program Plann* 1979; 2:197-207.
45. Sirey JA, Meyers BS, Teresi JA, Bruce ML, Ramirez M, Raue PJ, ... & Holmes D. The Cornell Service Index as a measure of health service use. *Psychiatr Serv* 2015; 56(12): 1564-1569.
46. Adams G, Gulliford MC, Ukoumunne OC, et al. Patterns of intra-cluster correlation from primary care research to inform study design and analysis. *J Clin Epidemiol* 2004;57:785-94.
47. Leon AC, Demirtas H, Li C, et al. Subject-level matching for imbalance in cluster randomized trials with a small number of clusters. *Pharm Stat* 2013;12:268-74.
48. Cuijpers P, Kleiboer A, Karyotaki E, et al. Internet and mobile interventions for depression: Opportunities and challenges. *Depress Anxiety* 2017;34:596-602.

1  
2  
3  
4  
5  
6  
7  
8  
9  
10  
11  
12  
13  
14  
15  
16  
17  
18  
19  
20  
21  
22  
23  
24  
25  
26  
27  
28  
29  
30  
31  
32  
33  
34  
35  
36  
37  
38  
39  
40  
41  
42  
43  
44  
45  
46  
47  
48  
49  
50  
51  
52  
53  
54  
55  
56  
57  
58  
59  
60

For peer review only

1  
2  
3  
4  
5  
6  
7  
8  
9  
10  
11  
12  
13  
14  
15  
16  
17  
18  
19  
20  
21  
22  
23  
24  
25  
26  
27  
28  
29  
30  
31  
32  
33  
34  
35  
36  
37  
38  
39  
40  
41  
42  
43  
44  
45  
46  
47  
48  
49  
50  
51  
52  
53  
54  
55  
56  
57  
58  
59  
60

Figure 1. Trial design, intervention, and end points

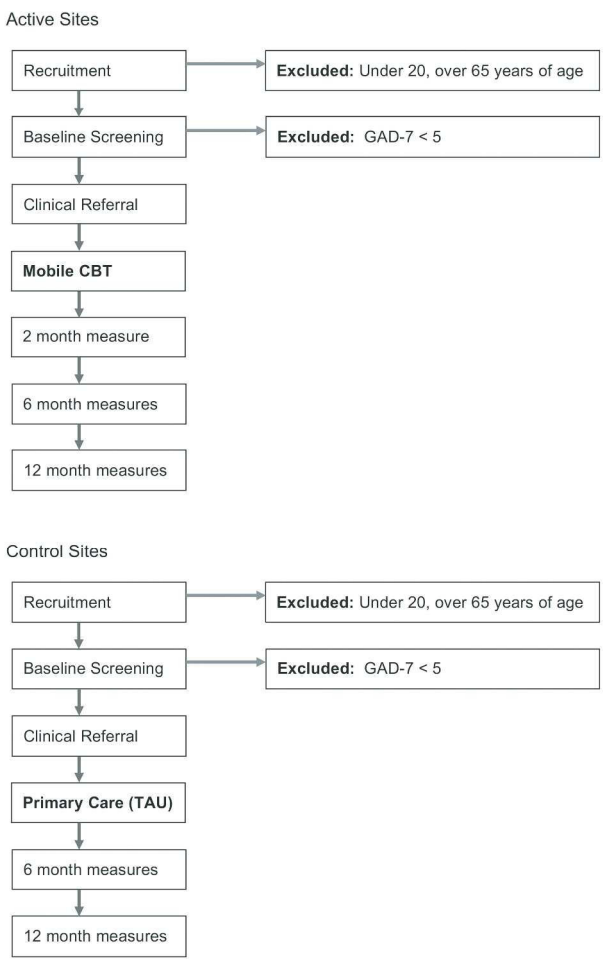

Figure 1. Trial design, intervention, and end points

215x279mm (300 x 300 DPI)
